# Supplementary material for: Zero-Valent Iron Nanoparticles Induce Reactive Oxygen Species in the Cyanobacterium, Fremyella diplosiphon
Source: PubMed Central journal article supplement — ACS Omega. 2021 Nov 23;6(48):32730–8. doi: 10.1021/acsomega.1c04482 (PMC8655921; doi:10.1021/acsomega.1c04482), 2021-11-23

## Supplementary Data

### **Zero-Valent Iron Nanoparticles Induce Reactive Oxygen Species in the Cyanobacterium, *Fremyella diplosiphon***

Samson M. Gichuki<sup>1</sup>, Yavuz S. Yalcin<sup>1</sup>, LaDonna Wyatt<sup>1</sup>, William Ghann<sup>2</sup>, Jamal Uddin<sup>2</sup>, Hyeonggon Kang<sup>2</sup>, and Viji Sittther<sup>1\*</sup>

<sup>1</sup>Department of Biology, Morgan State University, 1700 East Cold Spring Lane, Baltimore 21251, United States

<sup>2</sup>Center for Nanotechnology, Department of Natural Sciences, 2500 W North Ave, Coppin State University, Baltimore, MD 21216, United States

## Supplementary Data List

**Figure S1:** Transmission electron microscopy image of nanoscale zero-valent iron nanoparticles (nZVIs) to determine average size distribution of nZVIs used in the present study.

**Figure S1:** Transmission electron microscopy image of nanoscale zero-valent iron nanoparticles (nZVIs) to determine average size distribution of nZVIs used in the present study.

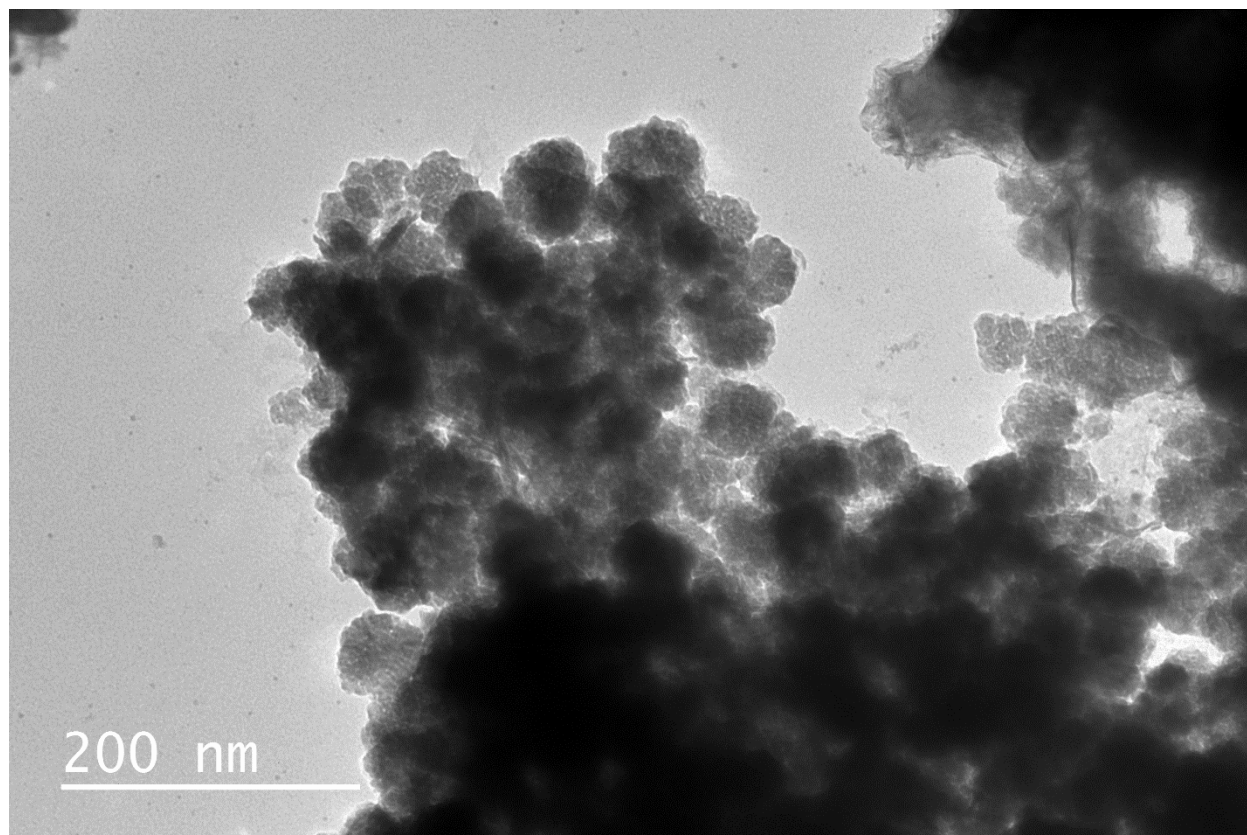

Supplement: ao1c04482_si_001.pdf [file ao1c04482_si_001.pdf]
